# Supplementary material for: Natural genetic variation caused by small insertions and deletions in the human genome
Source: HighWire-hosted journal article supplement (doi:10.1101/gr.115907.110), 2011-04-01

**Supplemental Figure 3. Three types of exon alterations  
caused by coding INDELs.**

**Full Exon Deletions**

Total: 80

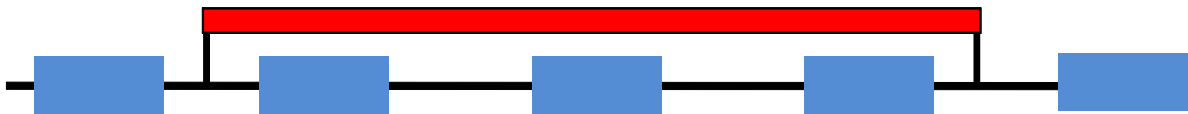

**Boundary Deletions**

Total: 104

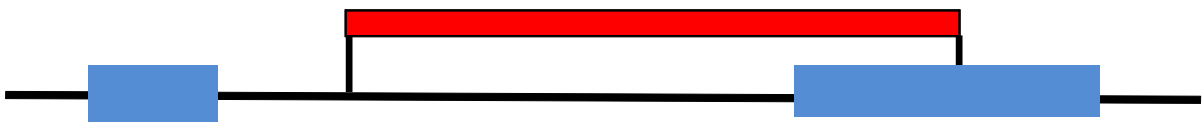

**Internal Exon Variants**

In-frame: 902  
Out of frame: 1,037

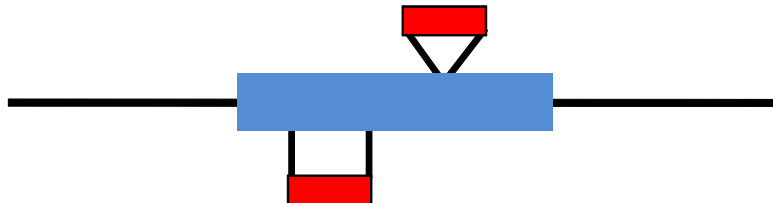

Supplement: Supplemental_Fig3.pdf [file Supplemental_Fig3.pdf]
