# Supplementary material for: Natural genetic variation caused by small insertions and deletions in the human genome
Source: HighWire-hosted journal article supplement (doi:10.1101/gr.115907.110), 2011-04-01
Supplement: Supplemental_Table_6.pdf [file Supplemental_Table_6.pdf]

**Supplemental Table 6. Genes possessing disruptive INDEL variants whose mouse orthologs, when disrupted, cause phenotypes.**

| <b>GENE SYMBOL</b> | <b>No. Of likely disruptive INDEL Alleles</b> | <b>Known disease associations</b>                                                           | <b>Mouse Homozygous Disruption Phenotype</b>                                                                                                                                                                                                                                                                            | <b>Mouse Heterozygous Disruption Phenotype</b> |
|--------------------|-----------------------------------------------|---------------------------------------------------------------------------------------------|-------------------------------------------------------------------------------------------------------------------------------------------------------------------------------------------------------------------------------------------------------------------------------------------------------------------------|------------------------------------------------|
| <i>ABCC1</i>       | 1                                             | No OMIM                                                                                     | homeostasis/metabolism, cardiovascular system, immune system                                                                                                                                                                                                                                                            | Not known                                      |
| <i>ADAMTS20</i>    | 1                                             | No OMIM                                                                                     | pigmentation, skin/coat/nails                                                                                                                                                                                                                                                                                           | Not known                                      |
| <i>ALDH3A1</i>     | 1                                             | No OMIM                                                                                     | normal                                                                                                                                                                                                                                                                                                                  |                                                |
| <i>AP3B2</i>       | 1                                             | No OMIM                                                                                     | nervous system, behavior/neurological                                                                                                                                                                                                                                                                                   | Not known                                      |
| <i>ARNT</i>        | 3                                             | Leukemia, acute myeloblastic                                                                | Tumorigenesis, normal, nervous system, renal/urinary system, liver/biliary system, lethality-prenatal/perinatal, homeostasis/metabolism, growth/size, endocrine/exocrine gland, embryogenesis, craniofacial, cellular, cardiovascular system, immune system, reproductive system, skin/coat/nails, hematopoietic system | Normal                                         |
| <i>ATP8B1</i>      | 1                                             | Cholestasis, progressive familial intrahepatic 1;Cholestasis, benign recurrent intrahepatic | Liver/biliary system, homeostasis/metabolism, growth/size                                                                                                                                                                                                                                                               | Not known                                      |
| <i>AURKC</i>       | 1                                             | Male infertility with large-headed, multiflagellar, polyploid spermatozoa                   | Reproductive system                                                                                                                                                                                                                                                                                                     | Not known                                      |
| <i>BACH1</i>       | 2                                             | No OMIM                                                                                     | muscle, homeostasis/metabolism, cardiovascular system                                                                                                                                                                                                                                                                   | Not known                                      |
| <i>BRWD1</i>       | 1                                             | No OMIM                                                                                     | reproductive system                                                                                                                                                                                                                                                                                                     | Not known                                      |
| <i>BUB1</i>        | 1                                             | Colorectal cancer with chromosomal instability                                              | Tumorigenesis, lethality-prenatal/perinatal, homeostasis/metabolism, growth/size, endocrine/exocrine gland, cellular, reproductive system                                                                                                                                                                               | Tumorigenesis, cellular                        |
| <i>C11orf73</i>    | 1                                             | No OMIM                                                                                     | lethality-prenatal/perinatal                                                                                                                                                                                                                                                                                            | Not known                                      |
| <i>C16orf35</i>    | 1                                             | No OMIM                                                                                     | liver/biliary system, lethality-prenatal/perinatal, skin/coat/nails, hematopoietic system                                                                                                                                                                                                                               | hematopoietic system                           |
| <i>C20orf19</i>    | 1                                             | No OMIM                                                                                     | normal                                                                                                                                                                                                                                                                                                                  |                                                |
| <i>CACNA1F</i>     | 1                                             | Night blindness, congenital                                                                 | Nervous system, vision/eye                                                                                                                                                                                                                                                                                              | Nervous system, vision/eye.                    |

|                |   |                                                                                                                              |                                                                                                                                                                                                                                                     |                                       |
|----------------|---|------------------------------------------------------------------------------------------------------------------------------|-----------------------------------------------------------------------------------------------------------------------------------------------------------------------------------------------------------------------------------------------------|---------------------------------------|
|                |   | stationary, X-linked, type 2A; Cone-rod dystrophy, X-linked; Aland Island eye disease                                        |                                                                                                                                                                                                                                                     | Human disease model.                  |
| <i>CALB1</i>   | 2 | No OMIM                                                                                                                      | nervous system, behavior/neurological                                                                                                                                                                                                               | nervous system, behavior/neurological |
| <i>CAMKK1</i>  | 1 | No OMIM                                                                                                                      | behavior/neurological                                                                                                                                                                                                                               | Not known                             |
| <i>CCNB2</i>   | 1 | No OMIM                                                                                                                      | lethality-prenatal/perinatal, growth/size, immune system, reproductive system, hematopoietic system                                                                                                                                                 | Not known                             |
| <i>CD207</i>   | 1 | No OMIM                                                                                                                      | immune system, hematopoietic system                                                                                                                                                                                                                 | Not known                             |
| <i>CEL</i>     | 2 | Maturity-onset diabetes of the young, type VIII                                                                              | Liver/biliary system, adipose tissue, homeostasis/metabolism, growth/size, digestive/alimentary                                                                                                                                                     | Not known                             |
| <i>CEP290</i>  | 1 | Joubert syndrome 5; Senior-Loken syndrome 6; Leber congenital amaurosis 10; Meckel syndrome type 4; Bardet-Biedl syndrome 14 | Pigmentation, nervous system, vision/eye                                                                                                                                                                                                            | Not known                             |
| <i>CLCN3</i>   | 1 | Ceroid Lipofuscinosis, Neuronal, 3;                                                                                          | nervous system, liver/biliary system, life span-post-weaning/aging, lethality-postnatal, adipose tissue, homeostasis/metabolism, growth/size, digestive/alimentary, behavior/neurological, immune system, reproductive system, skeleton, vision/eye | Not known                             |
| <i>COL4A2</i>  | 2 | No OMIM                                                                                                                      | lethality-prenatal/perinatal, growth/size, cardiovascular system, embryogenesis, nervous system                                                                                                                                                     | Not known                             |
| <i>COL7A1</i>  | 2 | Epidermolysis bullosa dystrophica                                                                                            | Normal, limbs/digits/tail, life span-post-weaning/aging, lethality-postnatal, growth/size, digestive/alimentary, skeleton, skin/coat/nails                                                                                                          | Not known                             |
| <i>CROCC</i>   | 1 | No OMIM                                                                                                                      | nervous system, immune system, respiratory system, vision/eye                                                                                                                                                                                       | Not known                             |
| <i>CSNK2A2</i> | 1 | Globozoospermia                                                                                                              | reproductive system                                                                                                                                                                                                                                 | Not known                             |
| <i>CYP27A1</i> | 1 | Cerebrotendinous xanthomatosis                                                                                               | Liver/biliary system, homeostasis/metabolism                                                                                                                                                                                                        | Not known                             |

|               |   |                                                |                                                                                                                                                                                                                                                                                                                                           |                                                  |
|---------------|---|------------------------------------------------|-------------------------------------------------------------------------------------------------------------------------------------------------------------------------------------------------------------------------------------------------------------------------------------------------------------------------------------------|--------------------------------------------------|
| <i>DAB2</i>   | 1 | No OMIM                                        | renal/urinary system, lethality-prenatal/perinatal, homeostasis/metabolism, growth/size, embryogenesis                                                                                                                                                                                                                                    | Not known                                        |
| <i>DICER1</i> | 1 | No OMIM                                        | liver/biliary system, limbs/digits/tail, life span-post-weaning/aging, lethality-postnatal, lethality-prenatal/perinatal, homeostasis/metabolism, growth/size, embryogenesis, cellular, cardiovascular system, behavior/neurological, immune system, respiratory system, skeleton, touch/vibrissae, skin/coat/nails, hematopoietic system | Not known                                        |
| <i>DLL3</i>   | 1 | Spondylocostal dysostosis, autosomal recessive | nervous system, muscle, limbs/digits/tail, lethality-postnatal, hearing/vestibular/ear, growth/size, embryogenesis, craniofacial, behavior/neurological, reproductive system, skeleton, vision/eye                                                                                                                                        | Not known                                        |
| <i>DOCK1</i>  | 1 | No OMIM                                        | muscle, lethality-postnatal, lethality-prenatal/perinatal, homeostasis/metabolism, growth/size, embryogenesis                                                                                                                                                                                                                             | Not known                                        |
| <i>DSCAM</i>  | 6 | No OMIM                                        | nervous system, life span-post-weaning/aging, behavior/neurological, skeleton, vision/eye, respiratory                                                                                                                                                                                                                                    | respiratory, nervous system, reproductive system |
| <i>EP400</i>  | 4 | No OMIM                                        | nervous system, lethality-prenatal/perinatal, embryogenesis, hematopoietic system                                                                                                                                                                                                                                                         | Not known                                        |
| <i>ERC2</i>   | 1 | No OMIM                                        | nervous system                                                                                                                                                                                                                                                                                                                            | Not known                                        |
| <i>ESAM</i>   | 1 | No OMIM                                        | growth/size, cardiovascular system, immune system                                                                                                                                                                                                                                                                                         | Not known                                        |
| <i>ESX1</i>   | 1 | No OMIM                                        | growth/size, embryogenesis                                                                                                                                                                                                                                                                                                                | growth/size, embryogenesis                       |
| <i>F7</i>     | 1 | Factor VII deficiency                          | Normal, lethality-prenatal/perinatal, homeostasis/metabolism, cardiovascular system                                                                                                                                                                                                                                                       | Normal                                           |
| <i>FAM48A</i> | 1 | No OMIM                                        | pigmentation, nervous system, lethality-prenatal/perinatal, growth/size, embryogenesis, cellular, vision/eye                                                                                                                                                                                                                              | Not known                                        |
| <i>FN1</i>    | 2 | Glomerulopathy with fibronectin deposits 2     | tumorigenesis, normal, nervous system, muscle, life span-post-weaning/aging, lethality-prenatal/perinatal, homeostasis/metabolism, growth/size, embryogenesis, cellular,                                                                                                                                                                  | Not known                                        |

|               |   |                                                                                                                                                        |                                                                                                                                                                                                                                                                                                                                                   |                                                                  |
|---------------|---|--------------------------------------------------------------------------------------------------------------------------------------------------------|---------------------------------------------------------------------------------------------------------------------------------------------------------------------------------------------------------------------------------------------------------------------------------------------------------------------------------------------------|------------------------------------------------------------------|
|               |   |                                                                                                                                                        | cardiovascular system, immune system, reproductive system, skeleton, other, hematopoietic system                                                                                                                                                                                                                                                  |                                                                  |
| <i>GBA</i>    | 2 | Gaucher disease;<br>Parkinson's disease                                                                                                                | Nervous system, liver/biliary system, life span-post-weaning/aging, lethality-postnatal, lethality-prenatal/perinatal, homeostasis/metabolism, growth/size, cardiovascular system, behavior/neurological, immune system, respiratory system, skeleton, skin/coat/nails, hematopoietic system                                                      | Homeostasis/metabolism                                           |
| <i>GLT8D1</i> | 1 | No OMIM                                                                                                                                                | normal                                                                                                                                                                                                                                                                                                                                            |                                                                  |
| <i>GPHB5</i>  | 1 | No OMIM                                                                                                                                                | normal                                                                                                                                                                                                                                                                                                                                            |                                                                  |
| <i>GRIN3B</i> | 1 | No OMIM                                                                                                                                                | growth/size, behavior/neurological                                                                                                                                                                                                                                                                                                                | Not known                                                        |
| <i>GRIP2</i>  | 2 | No OMIM                                                                                                                                                | normal                                                                                                                                                                                                                                                                                                                                            |                                                                  |
| <i>HADHB</i>  | 2 | Trifunctional protein deficiency                                                                                                                       | muscle, liver/biliary system, life span-post-weaning/aging, adipose tissue, homeostasis/metabolism, growth/size, cardiovascular system                                                                                                                                                                                                            | Not known                                                        |
| <i>INSR</i>   | 1 | Leprechaunism; Rabson-Mendenhall syndrome; Diabetes mellitus, insulin-resistant, with acanthosis nigricans; Hyperinsulinemic hypoglycemia, familial, 5 | Nervous system, renal/urinary system, muscle, liver/biliary system, life span-post-weaning/aging, lethality-postnatal, adipose tissue, Homeostasis/metabolism, growth/size, endocrine/exocrine gland, digestive/alimentary, cellular, cardiovascular system, behavior/neurological, respiratory system, reproductive system, hematopoietic system | Homeostasis/metabolism, digestive/alimentary, endocrine/exocrine |
| <i>IRAK3</i>  | 1 | Asthma susceptibility                                                                                                                                  | Limbs/digits/tail, growth/size, immune system, skeleton, hematopoietic system                                                                                                                                                                                                                                                                     | Not known                                                        |
| <i>KLF4</i>   | 1 | No OMIM                                                                                                                                                | tumorigenesis, lethality-prenatal/perinatal, homeostasis/metabolism, digestive/alimentary, behavior/neurological, skin/coat/nails                                                                                                                                                                                                                 | Not known                                                        |
| <i>KRT14</i>  | 7 | Epidermolysis bullosa simplex; Naegeli-Franceschetti-Jadassohn syndrome; Dermatopathia pigmentosa reticularis,                                         | Pigmentation, tumorigenesis, life span-post-weaning/aging, lethality-postnatal, digestive/alimentary, respiratory system, reproductive system, vision/eye, skin/coat/nails                                                                                                                                                                        | Not known                                                        |

|                |   |                                                                                                                              |                                                                                                                                                                                                                                                                             |                                                                             |
|----------------|---|------------------------------------------------------------------------------------------------------------------------------|-----------------------------------------------------------------------------------------------------------------------------------------------------------------------------------------------------------------------------------------------------------------------------|-----------------------------------------------------------------------------|
| <i>LHB</i>     | 1 | Hypogonadism, hypergonadotropic; Male pseudohermaphroditism                                                                  | homeostasis/metabolism, endocrine/exocrine gland, reproductive system                                                                                                                                                                                                       | Not known                                                                   |
| <i>LRP2</i>    | 1 | Donnai-Barrow syndrome                                                                                                       | Nervous system, renal/urinary system, lethality-prenatal/perinatal, homeostasis/metabolism, hearing/vestibular/ear, growth/size, endocrine/exocrine gland, embryogenesis, craniofacial, cellular, respiratory system, reproductive system, skeleton, vision/eye             | Hearing/vestibular/ear                                                      |
| <i>MAP3K14</i> | 1 | No OMIM                                                                                                                      | immune system                                                                                                                                                                                                                                                               | Not known                                                                   |
| <i>MAP7</i>    | 1 | No OMIM                                                                                                                      | endocrine/exocrine gland, reproductive system                                                                                                                                                                                                                               | Not known                                                                   |
| <i>MAPK7</i>   | 1 | No OMIM                                                                                                                      | nervous system, muscle, life span-post-weaning/aging, lethality-prenatal/perinatal, homeostasis/metabolism, hearing/vestibular/ear, growth/size, embryogenesis, digestive/alimentary, craniofacial, cellular, cardiovascular system, behavior/neurological, skin/coat/nails | Not known                                                                   |
| <i>MLL3</i>    | 1 | No OMIM                                                                                                                      | growth/size, cellular, reproductive system, vision/eye                                                                                                                                                                                                                      | Not known                                                                   |
| <i>MMP12</i>   | 2 | No OMIM                                                                                                                      | nervous system, homeostasis/metabolism, immune system, reproductive system                                                                                                                                                                                                  | Not known                                                                   |
| <i>MYO6</i>    | 1 | Deafness, autosomal dominant 22; Deafness, autosomal recessive 37; Deafness, sensorineural, with hypertrophic cardiomyopathy | Nervous system, hearing/vestibular/ear, growth/size, behavior/neurological, reproductive system, vision/eye                                                                                                                                                                 | Hearing/vestibular/ear                                                      |
| <i>MYT1</i>    | 1 | No OMIM                                                                                                                      | muscle, lethality-prenatal/perinatal, homeostasis/metabolism, endocrine/exocrine gland, digestive/alimentary                                                                                                                                                                | Not known                                                                   |
| <i>NBN</i>     | 2 | Nijmegen breakage syndrome; Leukemia, acute lymphoblastic                                                                    | tumorigenesis, nervous system, life span-post-weaning/aging, lethality-prenatal/perinatal, growth/size, endocrine/exocrine gland, embryogenesis, cellular, behavior/neurological, immune system, reproductive system, hematopoietic system                                  | Cellular, life span-post-weaning/aging, tumorigenesis. Human disease model. |

|                 |   |                                                   |                                                                                                                                                                                         |                      |
|-----------------|---|---------------------------------------------------|-----------------------------------------------------------------------------------------------------------------------------------------------------------------------------------------|----------------------|
| <i>NCOA3</i>    | 2 | No OMIM                                           | lethality-postnatal, homeostasis/metabolism, hearing/vestibular/ear, growth/size, endocrine/exocrine gland, embryogenesis, craniofacial, cellular, reproductive system, skin/coat/nails | Not known            |
| <i>NEFM</i>     | 1 | No OMIM                                           | nervous system                                                                                                                                                                          | Not known            |
| <i>NR2E3</i>    | 1 | Enhanced S-cone syndrome; Retinitis pigmentosa-37 | Nervous system, vision/eye                                                                                                                                                              | Not known            |
| <i>NTSR1</i>    | 1 | No OMIM                                           | nervous system, adipose tissue, homeostasis/metabolism, growth/size, digestive/alimentary, behavior/neurological, touch/vibrissae                                                       | digestive/alimentary |
| <i>PADI6</i>    | 1 | No OMIM                                           | embryogenesis, reproductive system                                                                                                                                                      | Not known            |
| <i>PATZ1</i>    | 1 | No OMIM                                           | endocrine/exocrine gland, reproductive system                                                                                                                                           | Not known            |
| <i>PCDH8</i>    | 1 | No OMIM                                           | normal                                                                                                                                                                                  |                      |
| <i>PERP</i>     | 1 | No OMIM                                           | lethality-postnatal, cellular                                                                                                                                                           | Not known            |
| <i>PFN2</i>     | 1 | No OMIM                                           | nervous system, cellular, behavior/neurological                                                                                                                                         | Not known            |
| <i>PIM2</i>     | 1 | No OMIM                                           | immune system, hematopoietic system                                                                                                                                                     | Not known            |
| <i>PKD1L3</i>   | 1 | No OMIM                                           | Normal                                                                                                                                                                                  |                      |
| <i>PNLIPRP2</i> | 2 | No OMIM                                           | homeostasis/metabolism, growth/size, digestive/alimentary, immune system                                                                                                                | Not known            |
| <i>PNOC</i>     | 1 | No OMIM                                           | homeostasis/metabolism, behavior/neurological, touch/vibrissae                                                                                                                          | Not known            |
| <i>PNPLA2</i>   | 1 | Neutral lipid storage disease with myopathy       | muscle, liver/biliary system, life span-post-weaning/aging, adipose tissue, homeostasis/metabolism, growth/size, cardiovascular system                                                  | Not known            |
| <i>POU2F1</i>   | 1 | No OMIM                                           | lethality-prenatal/perinatal, vision/eye, hematopoietic system                                                                                                                          | Not known            |
| <i>PPP1R9B</i>  | 2 | No OMIM                                           | nervous system, homeostasis/metabolism, growth/size, behavior/neurological                                                                                                              | Not known            |
| <i>PRKCH</i>    | 1 | Cerebral infarction susceptibility                | Tumorigenesis, homeostasis/metabolism, skin/coat/nails                                                                                                                                  | Not known            |
| <i>PRKDC</i>    | 2 | No OMIM                                           | tumorigenesis, life span-post-weaning/aging, homeostasis/metabolism, endocrine/exocrine gland, digestive/alimentary, cellular, immune                                                   | Not known            |

|                |   |                                                                        |                                                                                                                                                                                                                                                                                       |                                                                       |
|----------------|---|------------------------------------------------------------------------|---------------------------------------------------------------------------------------------------------------------------------------------------------------------------------------------------------------------------------------------------------------------------------------|-----------------------------------------------------------------------|
|                |   |                                                                        | system, hematopoietic system                                                                                                                                                                                                                                                          |                                                                       |
| <i>PTK7</i>    | 1 | No OMIM                                                                | nervous system, renal/urinary system, limbs/digits/tail, lethality-prenatal/perinatal, hearing/vestibular/ear, embryogenesis                                                                                                                                                          | Not known                                                             |
| <i>RAB3IP</i>  | 1 | No OMIM                                                                | normal                                                                                                                                                                                                                                                                                |                                                                       |
| <i>REC8</i>    | 1 | No OMIM                                                                | lethality-prenatal/perinatal, growth/size, endocrine/exocrine gland, reproductive system                                                                                                                                                                                              | Not known                                                             |
| <i>RECQL4</i>  | 1 | Rothmund-Thomson syndrome; RAPADILINO syndrome; Baller-Gerold syndrome | Pigmentation, tumorigenesis, limbs/digits/tail, life span-post-weaning/aging, lethality-postnatal, lethality-prenatal/perinatal, growth/size, embryogenesis, digestive/alimentary, craniofacial, cellular, immune system, skeleton, vision/eye, skin/coat/nails, hematopoietic system | Not known                                                             |
| <i>RETNLB</i>  | 2 | No OMIM                                                                | life span-post-weaning/aging, homeostasis/metabolism, digestive/alimentary, immune system                                                                                                                                                                                             | Not known                                                             |
| <i>RHBG</i>    | 1 | No OMIM                                                                | normal                                                                                                                                                                                                                                                                                |                                                                       |
| <i>RIPK2</i>   | 1 | No OMIM                                                                | immune system, hematopoietic system                                                                                                                                                                                                                                                   | Not known                                                             |
| <i>RP1</i>     | 1 | Retinitis pigmentosa-1                                                 | Nervous system, vision/eye                                                                                                                                                                                                                                                            | Vision/eye                                                            |
| <i>RYR3</i>    | 1 | No OMIM                                                                | nervous system, muscle, behavior/neurological                                                                                                                                                                                                                                         | behavior/neurological                                                 |
| <i>SARM1</i>   | 4 | No OMIM                                                                | cellular                                                                                                                                                                                                                                                                              | Not known                                                             |
| <i>SEBOX</i>   | 1 | No OMIM                                                                | Normal                                                                                                                                                                                                                                                                                |                                                                       |
| <i>SETD8</i>   | 1 | No OMIM                                                                | lethality-prenatal/perinatal                                                                                                                                                                                                                                                          | Not known                                                             |
| <i>SFRS1</i>   | 1 | No OMIM                                                                | lethality-prenatal/perinatal                                                                                                                                                                                                                                                          | Not known                                                             |
| <i>SLC18A1</i> | 1 | No OMIM                                                                | normal                                                                                                                                                                                                                                                                                |                                                                       |
| <i>SOX6</i>    | 1 | No OMIM                                                                | normal, limbs/digits/tail, lethality-postnatal, lethality-prenatal/perinatal, growth/size, respiratory system, skeleton                                                                                                                                                               | Not known                                                             |
| <i>ST3GAL1</i> | 1 | No OMIM                                                                | Immune system                                                                                                                                                                                                                                                                         | Not known                                                             |
| <i>STK17B</i>  | 1 | No OMIM                                                                | immune system, hematopoietic system                                                                                                                                                                                                                                                   | Not known                                                             |
| <i>TAP2</i>    | 1 | Bare lymphocyte syndrome, type I; Wegener-like granulomatosis          | Immune system, hematopoietic system                                                                                                                                                                                                                                                   | Not known                                                             |
| <i>TCOF1</i>   | 1 | Treacher Collins mandibulofacial dysostosis                            | Nervous system, lethality-prenatal/perinatal, hearing/vestibular/ear, growth/size, endocrine/exocrine gland, embryogenesis,                                                                                                                                                           | Nervous system, lethality-prenatal/perinatal, hearing/vestibular/ear, |

|              |   |                                       |                                                                                                                                                                                                                                                                          |                                                                                                                                                                                     |
|--------------|---|---------------------------------------|--------------------------------------------------------------------------------------------------------------------------------------------------------------------------------------------------------------------------------------------------------------------------|-------------------------------------------------------------------------------------------------------------------------------------------------------------------------------------|
|              |   |                                       | digestive/alimentary, craniofacial, cellular, respiratory system, skeleton, vision/eye, taste/olfaction                                                                                                                                                                  | growth/size, endocrine/exocrine gland, embryogenesis, digestive/alimentary, craniofacial, cellular, respiratory system, skeleton, vision/eye, taste/olfaction. Human disease model. |
| <i>TEKT4</i> | 6 | No OMIM                               | reproductive system                                                                                                                                                                                                                                                      | Not known                                                                                                                                                                           |
| <i>THBS2</i> | 1 | Lumbar disc herniation susceptibility | Tumorigenesis, muscle, limbs/digits/tail, life span-post-weaning/aging, lethality-prenatal/perinatal, homeostasis/metabolism, cellular, cardiovascular system, behavior/neurological, immune system, respiratory system, skeleton, skin/coat/nails, hematopoietic system | Not known                                                                                                                                                                           |
| <i>THBS4</i> | 1 | No OMIM                               | normal                                                                                                                                                                                                                                                                   |                                                                                                                                                                                     |
| <i>TYRO3</i> | 1 | No OMIM                               | nervous system, behavior/neurological                                                                                                                                                                                                                                    | Not known                                                                                                                                                                           |
| <i>ZFX</i>   | 2 | No OMIM                               | lethality-postnatal, lethality-prenatal/perinatal, growth/size, endocrine/exocrine gland, embryogenesis, behavior/neurological, reproductive system                                                                                                                      | lethality-postnatal, lethality-prenatal/perinatal, reproductive system                                                                                                              |
| <i>ZPBP</i>  | 1 | No OMIM                               | endocrine/exocrine gland, reproductive system                                                                                                                                                                                                                            | reproductive system                                                                                                                                                                 |
