# Supplementary figures and images for: Natural genetic variation caused by small insertions and deletions in the human genome
Source: HighWire-hosted journal article supplement (doi:10.1101/gr.115907.110), 2011-04-01

Supplemental Figure 1. Trace coverage of the human genome.

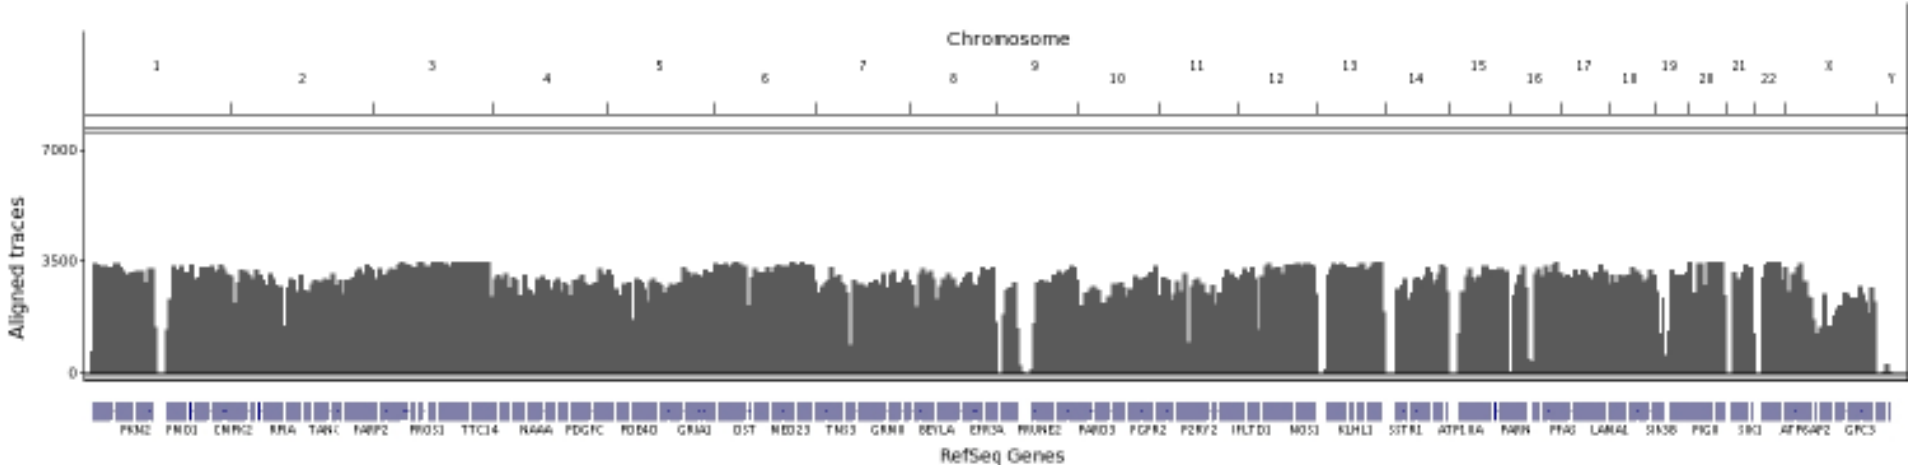

Supplement: Supplemental_Fig1.pdf [file Supplemental_Fig1.pdf]

Supplemental Figure 2. Plot of INDEL frequency vs. size

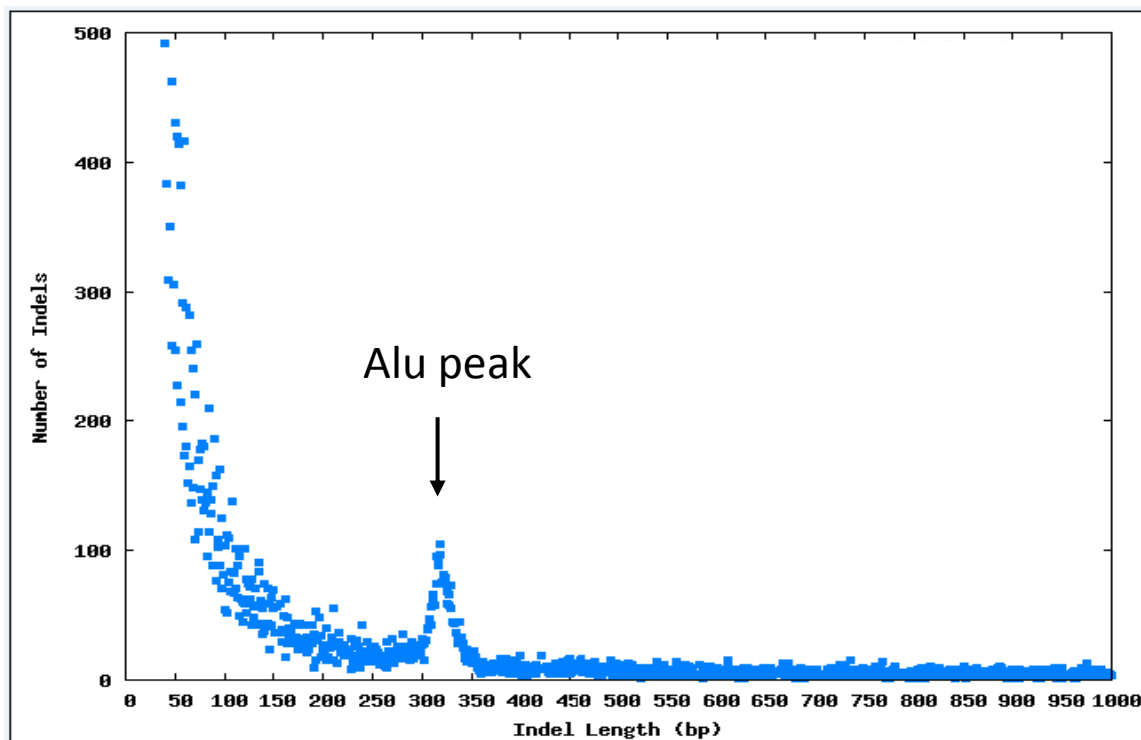

Supplement: Supplemental_Fig2.pdf [file Supplemental_Fig2.pdf]
